# Supplementary material
Source: PubMed Central journal article supplement (PMC8576062)
Supplement: NIHMS1708075-supplement-Supplemental.pdf [file NIHMS1708075-supplement-Supplemental.pdf]

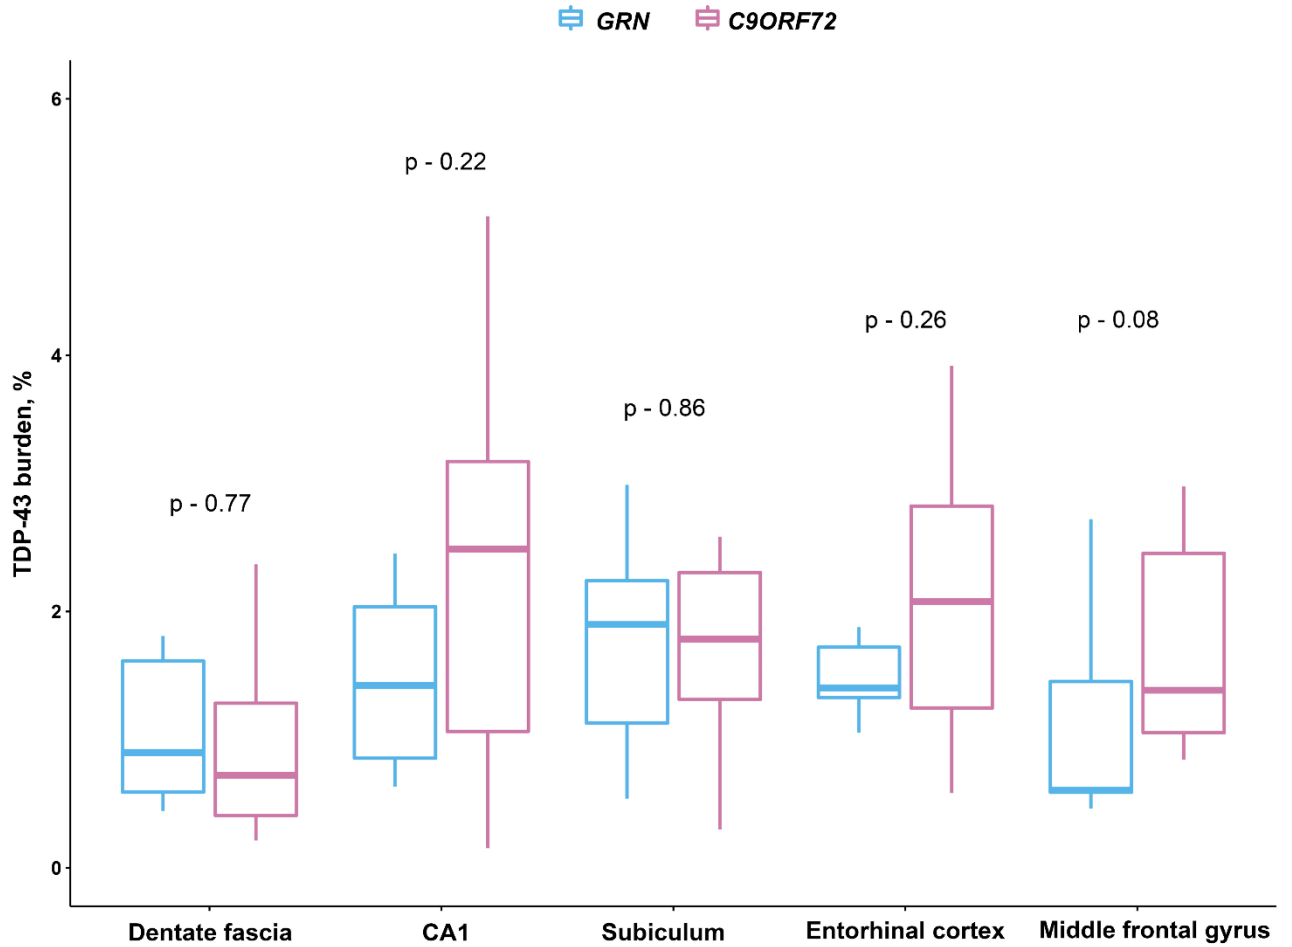

**Supplemental Fig. 1** Box plots showing regional TDP-43 burden differences and burden distribution between *GRN* and *C9ORF72* cases. The line in box plots represents the median, the box represents interquartile range and the whiskers correspond to minimum and maximum values. *P*-values are from Wilcoxon rank sum test

**Supplemental Table 1 Demographic and neuropathologic characteristics by mutation: *GRN* vs *C9ORF72***

| Characteristic                        | No. (% or interquartile range) |                       | p-value           |
|---------------------------------------|--------------------------------|-----------------------|-------------------|
|                                       | <i>GRN</i><br>n = 6            | <i>C9ORF72</i><br>n=9 |                   |
| Female                                | 3 (50%)                        | 3 (33%)               | 0.62              |
| White/Caucasian                       | 6 (100%)                       | 8 (89%)               | >0.99             |
| Age at onset, years                   | 66 (64 – 69)                   | 69 (64 – 72)          | 0.37              |
| Disease duration, years               | 12 (10 – 19)                   | 10 (8 – 15)           | 0.55              |
| Age at death, years                   | 80 (76 – 86)                   | 79 (76 – 83)          | >0.99             |
| Family history                        | 4 (67%)                        | 6 (67%)               | >0.99             |
| Education, years                      | 16 (10 – 18)                   | 13 (12 – 16)          | >0.99             |
| Last MMSE/30                          | 13 (3 – 26)                    | 17 (5 – 25)           | 0.79 <sup>a</sup> |
| <b>Clinical diagnosis</b>             |                                |                       |                   |
| FTLD clinical spectrum diagnosis      | 3 (43%)                        | 2 (22%)               |                   |
| <i>Frontotemporal dementia</i>        | 2 (29%)                        | 1 (11%)               |                   |
| <i>Primary progressive aphasia</i>    | 1 (14%)                        | 0 (0%)                |                   |
| <i>Progressive supranuclear palsy</i> | 0 (0%)                         | 1 (13%)               | 0.28              |
| Alzheimer's dementia                  | 3 (43%)                        | 6 (67%)               |                   |
| Dementia with Lewy bodies             | 0 (0%)                         | 1 (11%)               |                   |
| Vascular dementia                     | 1 (14%)                        | 0 (0%)                |                   |
| <b>Pathologic characteristics</b>     |                                |                       |                   |
| Time to autopsy, hours                | 3 (3 -3)                       | 5 (3 – 9)             | 0.28              |
| Brain weight, grams                   | 737 (615 – 1055)               | 920 (880 – 1070)      | 0.17              |
| <b>Tau (Braak NFT 0-VI)</b>           |                                |                       |                   |
| <b>Median Braak NFT stage</b>         | 1 (0 – 2)                      | 3 (2 – 4)             | 0.012             |
| Braak 0                               | 2 (33%)                        | 0 (0%)                |                   |
| Braak I                               | 2 (33%)                        | 0 (0%)                |                   |
| Braak II                              | 1 (17%)                        | 2 (22%)               |                   |
| Braak III                             | 1 (17%)                        | 4 (44%)               | 0.11              |
| Braak IV                              | 0 (0%)                         | 1 (11%)               |                   |
| Braak V                               | 0 (0%)                         | 2 (22%)               |                   |
| Braak VI                              | 0 (0%)                         | 0 (0%)                |                   |
| <b>Amyloid-β (Thal phases 0 -5)</b>   |                                |                       |                   |
| <b>Median CERAD</b>                   | 0 (0 – 0)                      | 0 (0 – 0)             | 0.50              |
| <b>Median Thal phase</b>              | 1 (0 – 2)                      | 1 (0 – 3)             | 0.58              |
| 0 ( no amyloid-β)                     | 2 (33%)                        | 3 (33%)               |                   |
| 1 (neocortical)                       | 3 (50%)                        | 3 (33%)               |                   |
| 2 (allocortex)                        | 1 (17%)                        | 1 (11%)               | >0.99             |
| 3 (thalamus, striatum)                | 0 (0%)                         | 1 (11%)               |                   |
| 4 (brainstem)                         | 0 (0%)                         | 1 (11%)               |                   |
| 5 (cerebellum)                        | 0 (0%)                         | 0 (0%)                |                   |

| <b>Alzheimer's disease neuropathologic changes</b> |           |           |       |
|----------------------------------------------------|-----------|-----------|-------|
| High likelihood                                    | 0 (0%)    | 0 (0%)    |       |
| Intermediate likelihood                            | 0 (0%)    | 3 (33%)   | 0.23  |
| Low likelihood/none                                | 6 (100%)  | 6 (67%)   |       |
| <b>Hippocampal sclerosis</b>                       | 4 (67%)   | 6 (67%)   | >0.99 |
| <i>moderate/severe</i>                             | 4 (67%)   | 5 (56%)   | >0.99 |
| <b>TDP-43 type</b>                                 |           |           |       |
| Type A                                             | 6 (100%)  | 7 (78%)   | 0.49  |
| Type B                                             | 0 (0%)    | 2 (22%)   |       |
| <b>Cerebrovascular disease</b>                     |           |           |       |
| Vascular score (0 – 4)                             | 2 (0 – 3) | 0 (0 – 2) | 0.26  |
| 0 (no lesions)                                     | 2 (33%)   | 5 (56%)   |       |
| 1 (mild CAA/arteriolosclerosis)                    | 0 (0%)    | 1 (11%)   |       |
| 2 (≥moderate CAA/arteriolosclerosis)               | 2 (33%)   | 2 (22%)   | 0.75  |
| 3 (micro-infarcts, no large infarcts)              | 1 (17%)   | 1 (11%)   |       |
| 4 (lacunar/large infarcts)                         | 1 (17%)   | 0 (0%)    |       |
| <b>Argyrophilic grains disease</b>                 | 1 (17%)   | 1 (11%)   | >0.99 |

Data are represented as median (range) for continuous variables or number (per cent) for categorical variables. *P*-values are from Wilcoxon rank sum test or Fisher's exact test

<sup>a</sup> adjusted for disease duration at time of last MMSE
